# Supplementary material for: Characterization of Xanthomonas citri pv. glycines Population Genetics and Virulence in a National Survey of Bacterial Pustule Disease in Korea
Source: PubMed Central journal article supplement — Plant Pathol J. 2021 Dec 1;37(6):652–61. doi: 10.5423/PPJ.FT.11.2021.0164 (PMC8666235; doi:10.5423/ppj.ft.11.2021.0164), 2021-12-01
Supplement: PPJ-FT-11-2021-0164-suppl.pdf [file PPJ-FT-11-2021-0164-suppl.pdf]

**Supplementary Table 1.** List of primers used in this study for the phylogenetic analysis of *Xanthomonas citri* pv. *glycines* type strains

| Gene                                             | Forward primer (5'-3')  | Reverse primer (5'-3') | References                   |
|--------------------------------------------------|-------------------------|------------------------|------------------------------|
| 16S ribosomal ribonucleic acid (16S rRNA)        | AGAGTTTGATCCTGGCTCAG    | TACCTTGTTACGACTT       | Frank et al. (2008)          |
| Gyrase subunit B gene ( <i>gyrB</i> )            | AAGCAGGGCAAGAGCGAGCTGTA | CAAGGTGCTGAAGATCTGGTC  | Parkinson et al. (2007)      |
| RNA polymerase beta subunit gene ( <i>rpoB</i> ) | TCAAGGAGCGTCTGTGCAT     | TCTGCCTCGTTGACCTTGA    | Ferreira-Tonin et al. (2012) |

## References

- Ferreira-Tonin, M., Rodrigues-Neto, J., Harakava, R. and Destéfano, S. A. L. 2012. Phylogenetic analysis of *Xanthomonas* based on partial *rpoB* gene sequences and species differentiation by PCR-RFLP. *Int. J. Syst. Evol.* 62:1419-1424.
- Frank, J. A., Reich, C. I., Sharma, S., Weisbaum, J. S., Wilson, B. A. and Olsen, G. J. 2008. Critical evaluation of two primers commonly used for amplification of bacterial 16S rRNA genes. *Appl. Environ. Microbiol.* 74:2461-2470.
- Parkinson, N., Aritua, V., Heeney, J., Cowie, C., Bew, J. and Stead, D. 2007. Phylogenetic analysis of *Xanthomonas* species by comparison of partial *gyrB* gene sequences. *Int. J. Syst. Evol. Microbiol.* 57:2881-2887.

**Supplementary Table 2.** List of *Xanthomonas citri* pv. *glycines* strains used in Southern blot analyses in this study

| Strain name | No. of avrBs3 repeats | Banding pattern <sup>a</sup> | Origin                                              |
|-------------|-----------------------|------------------------------|-----------------------------------------------------|
| K1          | 7                     | 7                            | Geosan-gun, Chungcheongbuk-do, isolated in 2017     |
| K2          | 5                     | 1                            | Danyang-gun, Chungcheongbuk-do, isolated in 2017    |
| K3          | 6                     | 2                            | Yeoncheon-gun, Gyeonggi-do, isolated in 2017        |
| K4          | 6                     | 2                            | Chungju-si, Chungcheongbuk-do, isolated in 2017     |
| K5          | 5                     | 1                            | Jecheon-si, Chungcheongbuk-do, isolated in 2017     |
| K6          | 6                     | 6                            | Muan-gun, Jeollanam-do, isolated in 2017            |
| K7          | 5                     | 1                            | Gochang-gun, Jeollabuk-do, isolated in 2017         |
| K8          | 5                     | 1                            | Gochang-gun, Jeollabuk-do, isolated in 2017         |
| K9          | 6                     | 2                            | Gochang-gun, Jeollabuk-do, isolated in 2017         |
| K10         | 6                     | 2                            | Taeon-gun, Chungcheongnam-do, isolated in 2017      |
| K11         | 6                     | 2                            | Taeon-gun, Chungcheongnam-do, isolated in 2017      |
| K12         | 6                     | 2                            | Sunchang-gun, Jeollabuk-do, isolated in 2017        |
| K13         | 4                     | 11                           | Jangheung-gun, Jeollanam-do, isolated in 2017       |
| K14         | 6                     | 2                            | Gongju-si, Chungcheongnam-do, isolated in 2016      |
| K15         | 6                     | 2                            | Gongju-si, Chungcheongnam-do, isolated in 2016      |
| K16         | 4                     | 3                            | Seosan-si, Chungcheongnam-do, isolated in 2016      |
| K17         | 5                     | 1                            | Yeoncheon-gun, Gyeonggi-do, isolated in 2016        |
| K18         | 5                     | 1                            | Chungju-si, Chungcheongbuk-do, isolated in 2016     |
| K19         | 5                     | 4                            | Cheongyang-gun, Chungcheongnam-do, isolated in 2016 |
| K20         | 5                     | 9                            | Cheongyang-gun, Chungcheongnam-do, isolated in 2016 |
| K21         | 5                     | 4                            | Cheongyang-gun, Chungcheongnam-do, isolated in 2016 |
| K22         | 6                     | 2                            | Youngwol-gun, Gangwon-do, isolated in 2015          |
| K23         | 5                     | 1                            | Youngwol-gun, Gangwon-do, isolated in 2015          |
| K24         | 6                     | 2                            | Youngwol-gun, Gangwon-do, isolated in 2015          |

|     |   |    |                                                  |
|-----|---|----|--------------------------------------------------|
| K25 | 5 | 1  | Jecheon-si, Chungcheongbuk-do, isolated in 2015  |
| K26 | 6 | 2  | Jecheon-si, Chungcheongbuk-do, isolated in 2015  |
| K27 | 5 | 1  | Jecheon-si, Chungcheongbuk-do, isolated in 2015  |
| K28 | 5 | 1  | Jecheon-si, Chungcheongbuk-do, isolated in 2015  |
| K29 | 5 | 1  | Jecheon-si, Chungcheongbuk-do, isolated in 2015  |
| K30 | 6 | 2  | Pyeongchang-gun, Gangwon-do, isolated in 2015    |
| K31 | 6 | 2  | Pyeongchang-gun, Gangwon-do, isolated in 2015    |
| K32 | 5 | 1  | Muan-gun, Jeollanam-do, isolated in 2015         |
| K33 | 5 | 1  | Muan-gun, Jeollanam-do, isolated in 2015         |
| K34 | 5 | 4  | Goesan-gun, Chungcheongbuk-do, isolated in 2015  |
| K35 | 5 | 1  | Goesan-gun, Chungcheongbuk-do, isolated in 2015  |
| K36 | 6 | 2  | Goesan-gun, Chungcheongbuk-do, isolated in 2015  |
| K37 | 6 | 2  | Danyang-gun, Chungcheongbuk-do, isolated in 2015 |
| K38 | 5 | 1  | Danyang-gun, Chungcheongbuk-do, isolated in 2015 |
| K39 | 5 | 1  | Inje-gun, Gangwon-do, isolated in 2015           |
| K40 | 6 | 2  | Chungju-si, Chungcheongbuk-do, isolated in 2015  |
| K41 | 6 | 2  | Chungju-si, Chungcheongbuk-do, isolated in 2015  |
| K42 | 5 | 1  | Chungju-si, Chungcheongbuk-do, isolated in 2015  |
| K43 | 5 | 1  | Muan-gun, Jeollanam-do, isolated in 2015         |
| K44 | 5 | 1  | Muan-gun, Jeollanam-do, isolated in 2015         |
| K45 | 5 | 1  | Pyeongchang-gun, Gangwon-do, isolated in 2015    |
| K46 | 4 | 10 | Pyeongchang-gun, Gangwon-do, isolated in 2015    |
| K47 | 4 | 3  | Seosan-si, Chungcheongnam-do, isolated in 2015   |
| K48 | 5 | 1  | Seosan-si, Chungcheongnam-do, isolated in 2015   |
| K49 | 5 | 1  | Muan-gun, Jeollanam-do, isolated in 2015         |
| K50 | 5 | 4  | Muan-gun, Jeollanam-do, isolated in 2015         |
| K51 | 6 | 2  | Chungju-si, Chungcheongbuk-do, isolated in 2015  |
| K52 | 5 | 1  | Danyang-gun, Chungcheongbuk-do, isolated in 2015 |
| K53 | 5 | 5  | Inje-gun, Gangwon-do, isolated in 2015           |
| K54 | 6 | 2  | Sunchang-gun, Jeollabuk-do, isolated in 2015     |
| K55 | 5 | 1  | Muan-gun, Jeollanam-do, isolated in 2015         |
| K56 | 5 | 1  | Suwon-si, Gyeonggi-do, isolated in 2013          |
| K57 | 6 | 2  | Suwon-si, Gyeonggi-do, isolated in 2013          |
| K58 | 5 | 1  | Suwon-si, Gyeonggi-do, isolated in 2013          |
| K59 | 5 | 1  | Suwon-si, Gyeonggi-do, isolated in 2013          |
| K60 | 5 | 1  | Suwon-si, Gyeonggi-do, isolated in 2013          |
| K61 | 6 | 2  | Gyeongsangbuk-do, isolated 2013                  |
| K62 | 5 | 1  | Gyeongsangbuk-do, isolated 2013                  |
| K63 | 5 | 1  | Gyeongsangbuk-do, isolated 2013                  |
| K64 | 5 | 1  | Pyeongtaek-si, Gyeonggi-do, isolated in 2013     |
| K65 | 5 | 1  | Yeoncheon-gun, Gyeonggi-do, isolated in 2013     |
| K66 | 5 | 1  | Chuncheon-si, Gangwon-do, isolated in 2013       |
| K67 | 6 | 2  | Chuncheon-si, Gangwon-do, isolated in 2013       |
| K68 | 5 | 1  | Chuncheon-si, Gangwon-do, isolated in 2013       |
| K69 | 5 | 1  | Chuncheon-si, Gangwon-do, isolated in 2013       |

|      |   |   |                                                     |
|------|---|---|-----------------------------------------------------|
| K70  | 5 | 1 | Chuncheon-si, Gangwon-do, isolated in 2013          |
| K71  | 5 | 1 | Chuncheon-si, Gangwon-do, isolated in 2013          |
| K72  | 5 | 1 | Chuncheon-si, Gangwon-do, isolated in 2013          |
| K73  | 5 | 1 | Miryang-si, Gyeongsangnam-do, isolated in 2013      |
| K74  | 5 | 1 | Miryang-si, Gyeongsangnam-do, isolated in 2013      |
| K75  | 5 | 1 | Miryang-si, Gyeongsangnam-do, isolated in 2013      |
| K76  | 6 | 2 | Yesan-gun, Chungcheongnam-do, isolated in 2013      |
| K77  | 5 | 1 | Chuncheon-si, Gangwon-do, isolated in 2013          |
| K78  | 5 | 1 | Chuncheon-si, Gangwon-do, isolated in 2013          |
| K79  | 6 | 8 | Sacheon-si, Gyeongsangnam-do, isolated in 2013      |
| K80  | 4 | 1 | Yeoncheon-gun, Gyeonggi-do, isolated in 2013        |
| K81  | 4 | 1 | Changwon-si, Gyeongsangnam-do, isolated in 2013     |
| K82  | 6 | 2 | Pyeongchang-gun, Gangwon-do, isolated in 2013       |
| K83  | 6 | 2 | Pyeongchang-gun, Gangwon-do, isolated in 2013       |
| K84  | 5 | 1 | Youngwol-gun, Gangwon-do, isolated in 2013          |
| K85  | 6 | 2 | Pyeongchang-gun, Gangwon-do, isolated in 2013       |
| K86  | 4 | 3 | Jinju-si, Gyeongsangnam-do, isolated in 2013        |
| K87  | 4 | 3 | Jinju-si, Gyeongsangnam-do, isolated in 2012        |
| K88  | 5 | 1 | Hongcheon-gun, Gangwon-do, isolated in 2012         |
| K89  | 6 | 2 | Hongcheon-gun, Gangwon-do, isolated in 2012         |
| K90  | 6 | 2 | Naju-si, Jeollanam-do, isolated in 2012             |
| K91  | 6 | 2 | Tae'an-gun, Chungcheongnam-do, isolated in 2017     |
| K92  | 6 | 2 | Goesan-gun, Chungcheongbuk-do, isolated in 2017     |
| K93  | 6 | 2 | Goesan-gun, Chungcheongbuk-do, isolated in 2017     |
| K94  | 6 | 2 | Goesan-gun, Chungcheongbuk-do, isolated in 2017     |
| K95  | 6 | 2 | Danyang-gun, Chungcheongbuk-do, isolated in 2015    |
| K96  | 5 | 1 | Yeoncheon-gun, Gyeonggi-do, isolated in 2017        |
| K97  | 6 | 2 | Gochang-gun, Jeollabuk-do, isolated in 2017         |
| K98  | 6 | 2 | Jangheung-gun, Jeollanam-do, isolated in 2017       |
| K99  | 6 | 2 | Gongju-si, Chungcheongnam-do, isolated in 2016      |
| K100 | 6 | 6 | Cheongyang-gun, Chungcheongnam-do, isolated in 2016 |
| K101 | 5 | 5 | Tae'an-gun, Chungcheongnam-do, isolated in 2016     |
| K102 | 5 | 1 | Chuncheon-si, Gangwon-do, isolated in 2013          |
| K103 | 6 | 2 | Pyeongchang-gun, Gangwon-do, isolated in 2013       |
| K104 | 5 | 1 | Pyeongchang-gun, Gangwon-do, isolated in 2013       |
| K105 | 4 | 3 | Iksan-si, Jeollabuk-do, isolated in 2013            |
| K106 | 5 | 1 | Iksan-si, Jeollabuk-do, isolated in 2013            |

<sup>a</sup>Banding pattern (type strain): 1 (K29), 2 (K10), 3 (K47), 4 (K34), 5 (K53), 6 (K100), 7 (K1), 8 (K79), 9 (K20), 10 (K46), 11 (K13).

|                                | K29   | K34   | K46   | K53   | K47   | K100  | K1    | K10   | K13   | K20   | K79   | 8ra   |
|--------------------------------|-------|-------|-------|-------|-------|-------|-------|-------|-------|-------|-------|-------|
| D-melibiose                    | 26(-) | 29(-) | 21(-) | 34(-) | 23(-) | 34(-) | 30(-) | 31(-) | 26(-) | 29(-) | 31(-) | 43(-) |
| <i>N</i> -Acetyl-D-glucosamine | 80(+) | 93(+) | 75(+) | 86(+) | 69(+) | 71(+) | 68(+) | 62(+) | 49(+) | 73(+) | 84(+) | 85(+) |
| $\alpha$ -D-glucose            | 59(+) | 90(+) | 75(+) | 83(+) | 55(+) | 68(+) | 69(+) | 67(+) | 49(+) | 70(+) | 85(+) | 83(+) |
| Glycerol                       | 21(-) | 31(-) | 33(-) | 33(-) | 19(-) | 20(-) | 21(-) | 23(-) | 16(-) | 19(-) | 27(-) | 33(-) |
| D-glucose-6-PO <sub>4</sub>    | 14(-) | 17(-) | 16(-) | 20(-) | 19(-) | 19(-) | 23(-) | 25(-) | 18(-) | 20(-) | 18(-) | 21(-) |
| D-fructose-6-PO <sub>4</sub>   | 22(-) | 22(-) | 25(-) | 23(-) | 24(-) | 26(-) | 27(-) | 38(-) | 22(-) | 23(-) | 25(-) | 29(-) |
| Rifamycin.SV                   | 100   | 100   | 100   | 100   | 100   | 100   | 92(+) | 71(+) | 74(+) | 100   | 100   | 100   |
| Gelatin                        | 78(+) | 98(+) | 65(+) | 93(+) | 69(+) | 64(+) | 76(+) | 56(+) | 44(+) | 76(+) | 88(+) | 86(+) |
| D-saccharic acid               | 16(-) | 16(-) | 16(-) | 18(-) | 15(-) | 17(-) | 17(-) | 16(-) | 17(-) | 15(-) | 16(-) | 18(-) |
| L-lactic acid                  | 23(-) | 24(-) | 22(-) | 29(-) | 19(-) | 25(-) | 28(-) | 18(-) | 22(-) | 22(-) | 28(-) | 28(-) |
| Nalidixic acid                 | 12(-) | 15(-) | 11(-) | 12(-) | 11(-) | 11(-) | 12(-) | 20(-) | 11(-) | 12(-) | 19(-) | 14(-) |
| Aztreonam                      | 90(+) | 78(+) | 50(+) | 96(+) | 46(/) | 53(+) | 51(+) | 75(+) | 31(/) | 53(+) | 84(+) | 76(+) |

**Supplementary Fig. 1.** Distinguishing features for *Xanthomonas citri* (PG I), based on Biolog GEN III data. Values are the percentage of intermediate and positive (i.e., / or +) strains.

**A**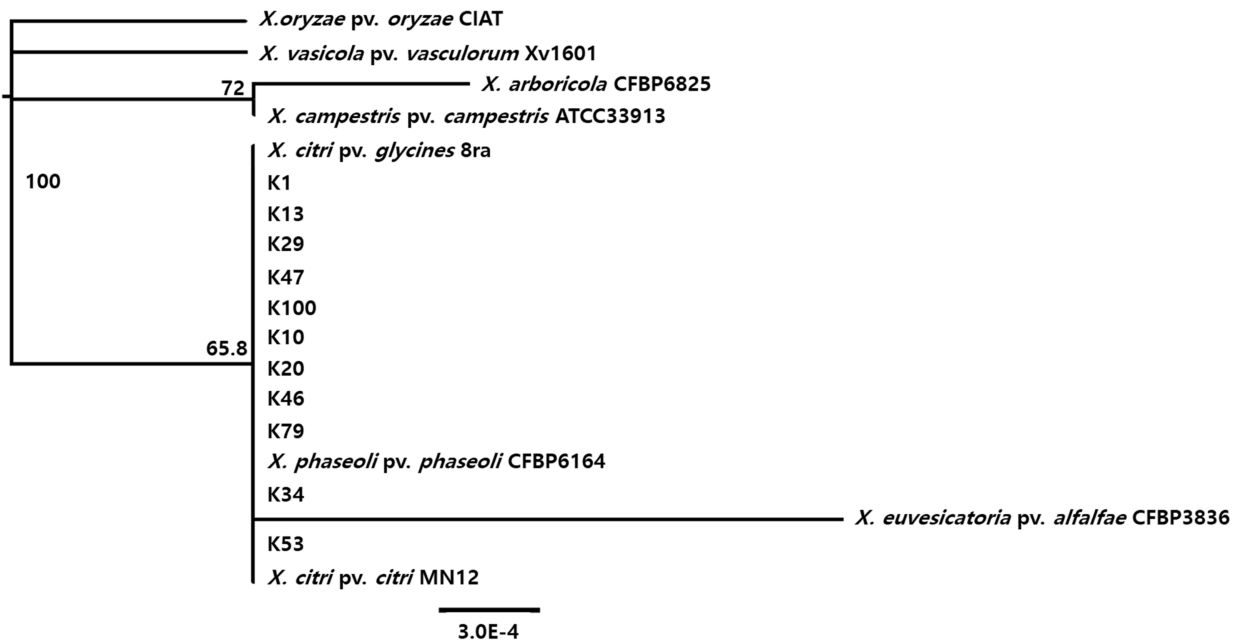**B**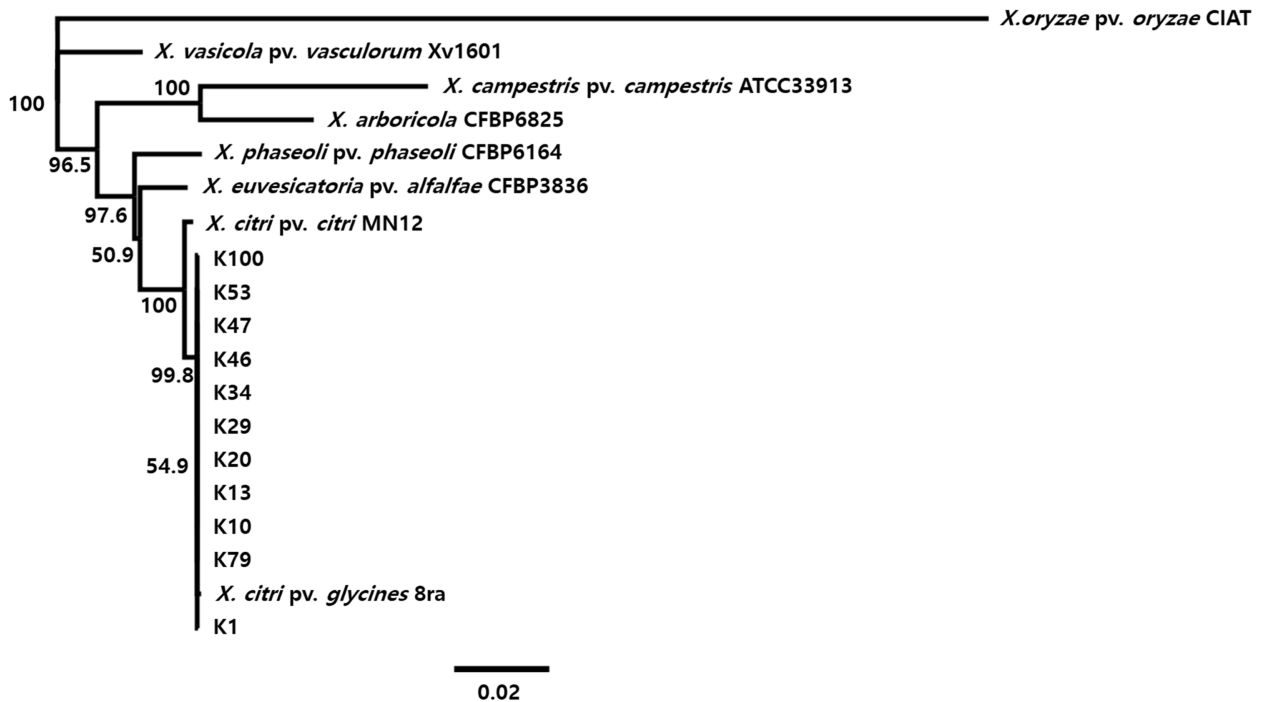

**Supplementary Fig. 2.** A phylogenetic analysis of *Xanthomonas citri* pv. *glycines* type strains based on 16S rRNA gene, DNA gyrase subunit B gene (*gyrB*) and RNA polymerase beta subunit gene (*rpoB*) sequences. The tree in (A) is based on the 16S rRNA gene, and the tree in (B) is based on a concatenation of *gyrB* and *rpoB*, with *X. oryzae* pv. *oryzae* used as an outgroup. The phylogenetic trees were generated by the Neighbor-Joining method with 1,000 bootstrap replicates and the bootstrap values are displayed on the trees. Bars (0.01) indicate the substitution rate per nucleotide position.
